# Supplementary material for: Samotolisib Attenuates Acute Liver Injury Through Inhibiting Caspase-11-Mediated Pyroptosis Via Regulating E3 Ubiquitin Ligase Nedd4
Source: Front Pharmacol. 2021 Aug 13;12:726198. doi: 10.3389/fphar.2021.726198 (PMC8414251; doi:10.3389/fphar.2021.726198)
Supplement: Supplementary file 3 [file DataSheet8.ZIP]

Archive with 21 entries (15 files):
- F1/
- F1/441 LDH.xlsx
- F1/CCK8.xlsx
- F1/LDH ST.xlsx
- F2/
- F2/AST,AST.xlsx
- F2/liver index.xlsx
- F2/survival.xlsx
- F3/
- F3/admin IL 10.xlsx
- F3/admin IL18 1B.xlsx
- F3/admin tnf.xlsx
- F3/admin_IL 6.xlsx
- F3/admin_MCP PCR.xlsx
- F3/IL 18 1B serum.xls
- F6/
- F6/admin NEDD4.xlsx
- SF1/
- SF1/LDH.xlsx
- SF2/
- SF2/ALT AST.xlsx
