# Supplementary material for: Samotolisib Attenuates Acute Liver Injury Through Inhibiting Caspase-11-Mediated Pyroptosis Via Regulating E3 Ubiquitin Ligase Nedd4
Source: Front Pharmacol. 2021 Aug 13;12:726198. doi: 10.3389/fphar.2021.726198 (PMC8414251; doi:10.3389/fphar.2021.726198)
Supplement: Supplementary file 3 [file DataSheet8.ZIP › F1/441 LDH.xlsx]

## Sheet: Sheet1
	OD
Maximum release of LDH	0.801	0.833	0.757
LPS	0.467	0.501	0.488
NC	0.215	0.197	0.201
Blank	0.198	0.189	0.192
1
	1	2	3	4	5	6	7	8	9	10
A	0.367	0.428	0.376	0.417	0.366	0.362	0.395	0.301	0.376	0.269
B	0.296	0.302	0.304	0.317	0.329	0.311	0.415	0.364	0.356	0.248
C	0.323	0.266	0.327	0.319	0.409	0.398	0.387	0.343	0.325	0.276
D	0.249	0.334	0.324	0.293	0.417	0.419	0.376	0.37	0.385	0.3
E	0.396	0.439	0.343	0.326	0.306	0.349	0.334	0.326	0.383	0.338
F	0.425	0.459	0.353	0.376	0.323	0.344	0.309	0.334	0.426	0.486
G	0.409	0.434	0.415	0.44	0.395	0.36	0.351	0.351	0.362	0.348
H	0.332	0.299	0.342	0.355	0.411	0.487	0.347	0.364	0.319	0.301
	2		3		4		5		6
	1	2	3	4	5	6	7	8	9	10
A	0.358	0.335	0.376	0.365	0.342	0.308	0.389	0.394	0.226	0.231
B	0.328	0.325	0.425	0.447	0.356	0.323	0.349	0.339	0.377	0.338
C	0.353	0.326	0.383	0.342	0.366	0.335	0.352	0.315	0.382	0.384
D	0.343	0.351	0.369	0.354	0.35	0.323	0.357	0.322	0.39	0.374
E	0.398	0.336	0.374	0.358	0.298	0.292	0.37	0.352	0.397	0.336
F	0.364	0.358	0.298	0.307	0.336	0.339	0.368	0.373	0.384	0.392
G	0.358	0.345	0.401	0.356	0.286	0.309	0.367	0.345	0.361	0.357
H	0.365	0.33	0.438	0.401	0.38	0.35	0.369	0.366	0.386	0.379
	7		8		9		10		11
2
	1	2	3	4	5	6	7	8	9	10
A	0.388	0.362	0.39	0.433	0.399	0.446	0.393	0.424	0.292	0.304
B	0.327	0.358	0.335	0.378	0.291	0.295	0.328	0.424	0.372	0.343
C	0.345	0.379	0.327	0.371	0.345	0.392	0.371	0.427	0.376	0.436
D	0.347	0.358	0.351	0.416	0.357	0.396	0.352	0.338	0.318	0.436
E	0.334	0.385	0.288	0.311	0.338	0.38	0.384	0.361	0.308	0.433
F	0.276	0.36	0.353	0.407	0.348	0.382	0.413	0.426	0.401	0.449
G	0.383	0.377	0.354	0.374	0.343	0.413	0.302	0.431	0.368	0.391
H	0.357	0.392	0.347	0.386	0.212	0.217	0.345	0.393	0.292	0.308
	2		3		4		5		6
	1	2	3	4	5	6	7	8	9	10
A	0.407	0.411	0.456	0.436	0.418	0.445	0.408	0.435	0.412	0.413
B	0.358	0.392	0.378	0.41	0.384	0.398	0.384	0.397	0.379	0.396
C	0.363	0.404	0.377	0.37	0.341	0.345	0.293	0.295	0.378	0.368
D	0.391	0.438	0.431	0.495	0.39	0.422	0.363	0.409	0.396	0.392
E	0.396	0.453	0.396	0.437	0.383	0.437	0.373	0.371	0.377	0.377
F	0.403	0.422	0.343	0.348	0.415	0.412	0.37	0.41	0.386	0.394
G	0.373	0.385	0.413	0.42	0.368	0.385	0.263	0.275	0.38	0.365
H	0.375	0.418	0.409	0.434	0.398	0.424	0.385	0.404	0.38	0.369
	7		8		9		10		11
3
	1	2	3	4	5	6	7	8	9	10
A	0.354	0.37	0.413	0.394	0.397	0.395	0.377	0.356	0.37	0.383
B	0.318	0.323	0.263	0.33	0.352	0.322	0.337	0.34	0.324	0.332
C	0.326	0.312	0.306	0.344	0.327	0.351	0.233	0.263	0.383	0.37
D	0.356	0.323	0.351	0.331	0.346	0.322	0.367	0.327	0.329	0.326
E	0.466	0.464	0.341	0.332	0.346	0.367	0.343	0.345	0.327	0.343
F	0.353	0.357	0.352	0.355	0.313	0.305	0.398	0.422	0.331	0.291
G	0.372	0.352	0.321	0.349	0.335	0.344	0.352	0.354	0.287	0.289
H	0.377	0.361	0.397	0.423	0.384	0.398	0.425	0.391	0.447	0.401
	2		3		4		5		6
	1	2	3	4	5	6	7	8	9	10
A	0.351	0.349	0.389	0.399	0.335	0.337	0.385	0.412	0.262	0.273
B	0.324	0.293	0.318	0.316	0.37	0.384	0.374	0.348	0.286	0.295
C	0.353	0.325	0.326	0.306	0.351	0.336	0.331	0.339	0.33	0.32
D	0.358	0.31	0.276	0.279	0.356	0.327	0.35	0.31	0.422	0.402
E	0.369	0.382	0.322	0.312	0.354	0.341	0.345	0.302	0.339	0.343
F	0.342	0.37	0.279	0.304	0.342	0.358	0.376	0.338	0.417	0.401
G	0.358	0.353	0.335	0.353	0.353	0.358	0.341	0.357	0.333	0.333
H	0.465	0.422	0.43	0.37	0.461	0.346	0.44	0.382	0.31	0.319
	7		8		9		10		11
4
	1	2	3	4	5	6	7	8	9	10
A	0.499	0.465	0.421	0.445	0.307	0.318	0.471	0.433	0.495	0.5
B	0.353	0.379	0.376	0.393	0.363	0.262	0.443	0.387	0.416	0.405
C	0.36	0.357	0.416	0.413	0.395	0.417	0.408	0.39	0.394	0.399
D	0.388	0.386	0.316	0.323	0.349	0.332	0.409	0.446	0.296	0.283
E	0.392	0.426	0.372	0.38	0.393	0.388	0.338	0.281	0.464	0.423
F	0.381	0.339	0.379	0.374	0.399	0.411	0.36	0.334	0.343	0.334
G	0.284	0.289	0.468	0.307	0.332	0.341	0.349	0.341	0.39	0.45
H	0.334	0.299	0.344	0.365	0.369	0.329	0.373	0.36	0.378	0.377
	2		3		4		5		6
	1	2	3	4	5	6	7	8	9	10
A	0.292	0.291	0.49	0.436	0.419	0.412	0.446	0.436	0.374	0.395
B	0.3	0.366	0.345	0.342	0.368	0.361	0.37	0.37	0.302	0.306
C	0.361	0.363	0.34	0.341	0.377	0.41	0.302	0.301	0.325	0.322
D	0.393	0.2327	0.352	0.345	0.323	0.356	0.363	0.338	0.384	0.363
E	0.385	0.4	0.359	0.334	0.416	0.443	0.356	0.344	0.305	0.319
F	0.425	0.462	0.32	0.38	0.344	0.381	0.413	0.369	0.418	0.388
G	0.299	0.3	0.292	0.318	0.295	0.306	0.358	0.347	0.365	0.415
H	0.325	0.368	0.477	0.479	0.424	0.399	0.547	0.422	0.416	0.435
	7		8		9		10		11
5
	1	2	3	4	5	6	7	8	9	10
A	0.486	0.471	0.41	0.417	0.426	0.386	0.297	0.31	0.48	0.54
B	0.27	0.27	0.33	0.334	0.437	0.494	0.428	0.43	0.443	0.437
C	0.415	0.373	0.39	0.358	0.396	0.394	0.336	0.353	0.452	0.448
D	0.279	0.263	0.267	0.259	0.372	0.375	0.39	0.396	0.454	0.452
E	0.405	0.423	0.466	0.387	0.372	0.37	0.379	0.375	0.337	0.348
F	0.39	0.391	0.399	0.413	0.41	0.391	0.248	0.278	0.391	0.381
G	0.423	0.393	0.427	0.424	0.388	0.393	0.372	0.359	0.512	0.491
H	0.428	0.42	0.475	0.463	0.431	0.433	0.447	0.477	0.469	0.525
	2		3		4		5		6
	1	2	3	4	5	6	7	8	9	10
A	0.498	0.482	0.486	0.493	0.471	0.493	0.491	0.502	0.495	0.482
B	0.439	0.442	0.436	0.365	0.32	0.328	0.427	0.408	0.488	0.498
C	0.387	0.426	0.355	0.398	0.41	0.401	0.384	0.422	0.477	0.407
D	0.416	0.378	0.414	0.389	0.409	0.497	0.41	0.465	0.477	0.405
E	0.384	0.381	0.409	0.415	0.331	0.344	0.402	0.415	0.404	0.429
F	0.395	0.372	0.415	0.433	0.41	0.406	0.361	0.33	0.302	0.357
G	0.458	0.467	0.293	0.314	0.378	0.367	0.44	0.448	0.481	0.392
H	0.419	0.42	0.481	0.455	0.408	0.424			0.474	0.535
	7		8		9		10		11
6
	1	2	3	4	5	6	7	8	9	10
A	0.372	0.389	0.4	0.412
B	0.296	0.31	0.266	0.284
C	0.329	0.345	0.364	0.378
D	0.364	0.353	0.367	0.381
E	0.315	0.307	0.367	0.381
F	0.381	0.371	0.379	0.378
G	0.405	0.394
H	0.42	0.406
	2		3		4		5		6
007-009
	1	2	3	4	5	6	7	8	9	10
A	0.319	0.326	0.395	0.396	0.235	0.231	0.341	0.342	0.284	0.282
B	0.364	0.357	0.358	0.373	0.312	0.329	0.377	0.325	0.374	0.354
C	0.318	0.308	0.348	0.335	0.313	0.327	0.331	0.367	0.37	0.371
D	0.339	0.373	0.219	0.219	0.251	0.252	0.408	0.364
E	0.375	0.374	0.355	0.326	0.347	0.383
F	0.35	0.345			0.363	0.336
G	0.379	0.38			0.368	0.425
H	0.431	0.418			0.386	0.363
	7 2		7 3		8 2		8 3		6
