# Supplementary material for: Samotolisib Attenuates Acute Liver Injury Through Inhibiting Caspase-11-Mediated Pyroptosis Via Regulating E3 Ubiquitin Ligase Nedd4
Source: Front Pharmacol. 2021 Aug 13;12:726198. doi: 10.3389/fphar.2021.726198 (PMC8414251; doi:10.3389/fphar.2021.726198)
Supplement: Supplementary file 3 [file DataSheet8.ZIP › F1/CCK8.xlsx]

## Sheet: Sheet1
	OD
1 11A	0.191	0.23	0.226
2-4H	0.172	0.17	0.165
2 10G	0.991	1.041	0.987
3 5C	0.961	0.946	0.972
3 8D	0.596	0.686	0.625
3 11A	0.876	0.883	0.909
5 2B	0.203	0.206	0.218
5 2D	0.226	0.16	0.162
5 3D	0.885	0.952	0.891
5 5F	0.176	0.166	0.161
6-3B	0.152	0.135	0.143
7 3D	0.928	0.988	0.961
8 2A	0.472	0.524	0.569
8 2D	0.258	0.241	0.238
9 2A	0.849	0.828	0.785
NC	1.061	1.014	1.072
Blank	0.128	0.127	0.132
