# Supplementary material for: Samotolisib Attenuates Acute Liver Injury Through Inhibiting Caspase-11-Mediated Pyroptosis Via Regulating E3 Ubiquitin Ligase Nedd4
Source: Front Pharmacol. 2021 Aug 13;12:726198. doi: 10.3389/fphar.2021.726198 (PMC8414251; doi:10.3389/fphar.2021.726198)
Supplement: Supplementary file 3 [file DataSheet8.ZIP › F1/LDH ST.xlsx]

## Sheet: Sheet1
	OD
Blank	0.189	0.184	0.197
NC	0.19	0.204	0.21
pam	0.217	0.199	0.202
pam ST 10	0.201	0.212	0.206
pam LPS	0.533	0.483	0.492
pam LPS ST 2.5	0.432	0.397	0.423
pam LPS ST 5	0.284	0.336	0.332
pam LPS ST 10	0.276	0.319	0.288
Maximum release of LDH	0.841	0.827	0.772
