# Supplementary material for: Samotolisib Attenuates Acute Liver Injury Through Inhibiting Caspase-11-Mediated Pyroptosis Via Regulating E3 Ubiquitin Ligase Nedd4
Source: Front Pharmacol. 2021 Aug 13;12:726198. doi: 10.3389/fphar.2021.726198 (PMC8414251; doi:10.3389/fphar.2021.726198)
Supplement: Supplementary file 3 [file DataSheet8.ZIP › F2/AST,AST.xlsx]

## Sheet: Sheet1
AST(U/L)
NC						ST						LPS						ST+LPS
192	201	218	190	242	246	204	221	221	202	217	231	461	456	478	429	401	351	217	280	288	267	236	264
ALT(U/L)
NC						ST						LPS						ST+LPS
75	69	60	58	55	58	69	63	68	73	81	70	217	234	238	200	243	139	51	75	76	83	68	79
