# Supplementary material for: Samotolisib Attenuates Acute Liver Injury Through Inhibiting Caspase-11-Mediated Pyroptosis Via Regulating E3 Ubiquitin Ligase Nedd4
Source: Front Pharmacol. 2021 Aug 13;12:726198. doi: 10.3389/fphar.2021.726198 (PMC8414251; doi:10.3389/fphar.2021.726198)
Supplement: Supplementary file 3 [file DataSheet8.ZIP › F2/liver index.xlsx]

## Sheet: Sheet1
	NC
body weight(g)	23.5	24.3	21.8	24.1	23.3	23.8
liver weight(g)	0.93	1.04	0.91	1.01	0.97	0.95
liver index(%)	3.95745	4.27984	4.17431	4.19087	4.16309	3.9916
	ST
body weight(g)	23.7	23.5	23.8	24.2	22.6	22.4
liver weight(g)	0.96	0.92	0.99	1.02	0.92	0.95
liver index(%)	4.05063	3.91489	4.15966	4.21488	4.0708	4.24107
	LPS
body weight(g)	22.5	23.4	21.8	24.4	23	22.9
liver weight(g)	1.46	1.35	1.33	1.36	1.51	1.44
liver index(%)	6.48889	5.76923	6.10092	5.57377	6.56522	6.28821
	SL
body weight(g)	24.7	21.5	23.3	24.1	23.6	22.7
liver weight(g)	1.16	1.32	1.28	1.23	1.29	1.15
liver index(%)	4.69636	6.13953	5.49356	5.10373	5.4661	5.06608
