# Supplementary material for: Samotolisib Attenuates Acute Liver Injury Through Inhibiting Caspase-11-Mediated Pyroptosis Via Regulating E3 Ubiquitin Ligase Nedd4
Source: Front Pharmacol. 2021 Aug 13;12:726198. doi: 10.3389/fphar.2021.726198 (PMC8414251; doi:10.3389/fphar.2021.726198)
Supplement: Supplementary file 3 [file DataSheet8.ZIP › F2/survival.xlsx]

## Sheet: Sheet1
Number of dead mice at different time points
	6	12	15	18	24	30	36	42	48	（h）
nc
st
lps		1	3	2	2		1		1
l+s						2		1
