# Supplementary material for: Samotolisib Attenuates Acute Liver Injury Through Inhibiting Caspase-11-Mediated Pyroptosis Via Regulating E3 Ubiquitin Ligase Nedd4
Source: Front Pharmacol. 2021 Aug 13;12:726198. doi: 10.3389/fphar.2021.726198 (PMC8414251; doi:10.3389/fphar.2021.726198)
Supplement: Supplementary file 3 [file DataSheet8.ZIP › F3/admin IL18 1B.xlsx]

## Sheet: 0
	Data Set	Target	Sample	Ctrl	Relative Quantity	Relative Quantity SD	Corrected Relative Quantity SD	Relative Quantity SEM	Corrected Relative Quantity SEM	Unscaled Expression	Unscaled Expression SD	Corrected Unscaled Expression SD	Unscaled Expression SEM	Corrected Unscaled Expression SEM	Expression	Expression SD	Corrected Expression SD	Expression SEM	Corrected Expression SEM	Wells	Mean Cq	Cq SD	Cq SEM
	1-SYBR	18	lps		24.9965	3.42019	3.42019	2.41844	2.41844	9.10391	1.25598	1.25598	0.88811	0.88811	9.10391	1.25598	1.25598	0.88811	0.88811	2	22.4358	0.197399	0.139582
	1-SYBR	18	SL		11.4596	1.57691	1.57691	1.11504	1.11504	3.83816	0.537481	0.537481	0.380056	0.380056	3.83816	0.537481	0.537481	0.380056	0.380056	2	23.5609	0.198523	0.140377
	1-SYBR	18	st		6.63719	0.781646	0.781646	0.552707	0.552707	0.843783	0.135277	0.135277	0.0956551	0.0956551	0.843783	0.135277	0.135277	0.0956551	0.0956551	2	24.3488	0.169903	0.120139
	1-SYBR	18	con	*	1	0.0662528	0.0662528	0.0468478	0.0468478	1	0.0664778	0.0664778	0.0470069	0.0470069	1	0.0664778	0.0664778	0.0470069	0.0470069	2	27.0794	0.0955826	0.0675871
	1-SYBR	1b	lps		20.5353	3.10303	3.10303	2.19418	2.19418	7.4791	1.13783	1.13783	0.804567	0.804567	7.4791	1.13783	1.13783	0.804567	0.804567	2	26.6242	0.218002	0.15415
	1-SYBR	1b	SL		12.1105	1.32303	1.32303	0.935522	0.935522	4.05616	0.455476	0.455476	0.32207	0.32207	4.05616	0.455476	0.455476	0.32207	0.32207	2	27.386	0.157609	0.111446
	1-SYBR	1b	st		8.10757	0.540575	0.540575	0.382245	0.382245	1.03071	0.131509	0.131509	0.0929912	0.0929912	1.03071	0.131509	0.131509	0.0929912	0.0929912	2	27.965	0.0961923	0.0680182
	1-SYBR	1b	con	*	1	0.0794286	0.0794286	0.0561645	0.0561645	1	0.0796163	0.0796163	0.0562973	0.0562973	1	0.0796163	0.0796163	0.0562973	0.0562973	2	30.9842	0.114591	0.0810282
	1-SYBR	Actin	lps		2.74569	0.0484608	0.0484608	0.0342669	0.0342669											2	18.738	0.0254632	0.0180052
	1-SYBR	Actin	SL		2.98571	0.0775634	0.0775634	0.0548456	0.0548456											2	18.6171	0.0374786	0.0265014
	1-SYBR	Actin	st		7.86598	0.855687	0.855687	0.605062	0.605062											2	17.2195	0.156941	0.110974
	1-SYBR	Actin	con	*	1	0.00546481	0.00546481	0.0038642	0.0038642											2	20.1952	0.00788405	0.00557487

## Sheet: Run Information
File Name	admin_2021-04-21 18 1B.pcrd
Created By User	admin
Notes
ID
Run Started	2021/4/21 10:57:25 UTC +08:00
Run Ended	2021/4/21 12:39:36 UTC +08:00
Sample Vol	10
Lid Temp	105
Protocol File Name	65.prcl
Plate Setup File Name	21.04.21.pltd
Base Serial Number	CC017583
Optical Head Serial Number	785BR10076
CFX Manager Version	3.0.1224.1015.
