# Supplementary material for: Samotolisib Attenuates Acute Liver Injury Through Inhibiting Caspase-11-Mediated Pyroptosis Via Regulating E3 Ubiquitin Ligase Nedd4
Source: Front Pharmacol. 2021 Aug 13;12:726198. doi: 10.3389/fphar.2021.726198 (PMC8414251; doi:10.3389/fphar.2021.726198)
Supplement: Supplementary file 3 [file DataSheet8.ZIP › F3/admin_IL 6.xlsx]

## Sheet: 0
	Data Set	Target	Sample	Ctrl	Relative Quantity	Relative Quantity SD	Corrected Relative Quantity SD	Relative Quantity SEM	Corrected Relative Quantity SEM	Unscaled Expression	Unscaled Expression SD	Corrected Unscaled Expression SD	Unscaled Expression SEM	Corrected Unscaled Expression SEM	Expression	Expression SD	Corrected Expression SD	Expression SEM	Corrected Expression SEM	Wells	Mean Cq	Cq SD	Cq SEM
	1-SYBR	Actin	CON	*	1	0.0207242	0.0207242	0.0119651	0.0119651											3	18.3319	0.0298988	0.0172621
	1-SYBR	Actin	ST		1.58926	0.113332	0.113332	0.0654322	0.0654322											3	17.6636	0.10288	0.0593978
	1-SYBR	Actin	LPS		0.273579	0.0167259	0.0167259	0.00965668	0.00965668											3	20.2019	0.0882025	0.0509238
	1-SYBR	Actin	SL		1.03774	0.0463417	0.0463417	0.0267554	0.0267554											3	18.2785	0.0644252	0.0371959
	1-SYBR	IL6	CON	*	1	0.159705	0.159705	0.0922057	0.0922057	1	0.161044	0.161044	0.0929788	0.0929788	1	0.161044	0.161044	0.0929788	0.0929788	3	29.3741	0.230405	0.133025
	1-SYBR	IL6	ST		1.26713	0.20585	0.20585	0.118847	0.118847	0.797309	0.141455	0.141455	0.081669	0.081669	0.797309	0.141455	0.141455	0.081669	0.081669	3	29.0326	0.23437	0.135314
	1-SYBR	IL6	LPS		1.43536	0.156808	0.156808	0.0905332	0.0905332	5.24662	0.656824	0.656824	0.379218	0.379218	5.24662	0.656824	0.656824	0.379218	0.379218	3	28.8527	0.157609	0.0909957
	1-SYBR	IL6	SL		2.24598	0.130079	0.130079	0.0751014	0.0751014	2.16429	0.158282	0.158282	0.0913842	0.0913842	2.16429	0.158282	0.158282	0.0913842	0.0913842	3	28.2068	0.0835558	0.0482409
	1-SYBR
	1-SYBR
	1-SYBR
	1-SYBR
	1-SYBR
	1-SYBR
	1-SYBR
	1-SYBR
	1-SYBR
	1-SYBR
	1-SYBR
	1-SYBR
	1-SYBR

## Sheet: Run Information
File Name	admin_2020-12-29 CAS11 GSDMD.pcrd
Created By User	admin
Notes
ID
Run Started	2020/12/29 16:34:09 UTC +08:00
Run Ended	2020/12/29 18:21:26 UTC +08:00
Sample Vol	9
Lid Temp	105
Protocol File Name	我的程序-3-fjw.prcl
Plate Setup File Name	55.7.pltd
Base Serial Number	CC017583
Optical Head Serial Number	785BR10076
CFX Manager Version	3.0.1224.1015.
