# Supplementary material for: Samotolisib Attenuates Acute Liver Injury Through Inhibiting Caspase-11-Mediated Pyroptosis Via Regulating E3 Ubiquitin Ligase Nedd4
Source: Front Pharmacol. 2021 Aug 13;12:726198. doi: 10.3389/fphar.2021.726198 (PMC8414251; doi:10.3389/fphar.2021.726198)
Supplement: Supplementary file 3 [file DataSheet8.ZIP › F3/IL 18 1B serum.xls]

## Sheet: Sheet1
IL-1B	OD
NC	0.631	0.528	0.629	0.538	0.528	0.624	SAM	0.649	0.653	0.603	0.639	0.702	0.594	S+L	1.809	1.916	1.989	1.732	1.729	1.664	LPS	2.162	2.145	2.714	2.418	2.721	2.428
1.912	1.098	0.561	0.431	0.275	0.166	0.146
1000	500	250	125	62.5	31.25	15.6
IL-18
1.888	0.947	0.477	0.303	0.242	0.196	0.172		OD
1000	500	250	125	62.5	31.25	15.6	NC	0.684	0.721	0.714	0.632	0.512	0.523	ST	0.691	0.624	0.734	0.618	0.814	0.524	lps	1.923	2.543	1.972	2.748	2.856	2.482	LPS+sam	1.477	1.842	1.512	1.245	1.535	1.757
