# Supplementary material for: Samotolisib Attenuates Acute Liver Injury Through Inhibiting Caspase-11-Mediated Pyroptosis Via Regulating E3 Ubiquitin Ligase Nedd4
Source: Front Pharmacol. 2021 Aug 13;12:726198. doi: 10.3389/fphar.2021.726198 (PMC8414251; doi:10.3389/fphar.2021.726198)
Supplement: Supplementary file 3 [file DataSheet8.ZIP › SF1/LDH.xlsx]

## Sheet: Sheet1
	OD
Blank	0.191	0.19	0.193
NC	0.195	0.211	0.199
pam LPS	0.482	0.469	0.512
Maximum release of LDH	0.822	0.801	0.762
