# Supplementary material for: Samotolisib Attenuates Acute Liver Injury Through Inhibiting Caspase-11-Mediated Pyroptosis Via Regulating E3 Ubiquitin Ligase Nedd4
Source: Front Pharmacol. 2021 Aug 13;12:726198. doi: 10.3389/fphar.2021.726198 (PMC8414251; doi:10.3389/fphar.2021.726198)
Supplement: Supplementary file 3 [file DataSheet8.ZIP › SF2/ALT AST.xlsx]

## Sheet: Sheet1
ALT(U/L)
NC						LPS						2.5						5						10
75	69	60	58	55	58	217	234	238	200	243	139	193	153	194	159	174	168	51	75	76	83	68	79	84	63	73	93	78	59
AST(U/L)
NC						LPS						2.5						5						10
192	201	218	190	242	246	461	456	478	429	401	351	391	321	328	408	324	373	217	280	288	267	236	264	284	258	319	274	251	239
